RESEARCH ARTICLE

# Biphasic concentration-dependent interaction between imidacloprid and dietary phytochemicals in honey bees (*Apis mellifera*)

Michael J. Wong, Ling-Hsiu Liao \*, May R. Berenbaum

Department of Entomology, University of Illinois at Urbana-Champaign, Urbana, Illinois, United States of America

\* [liao19@illinois.edu](mailto:liao19@illinois.edu)

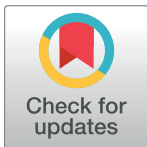

## Abstract

### Background

The presence of the neonicotinoid imidacloprid in nectar, honey, pollen, beebread and beeswax has been implicated in declines worldwide in the health of the western honey bee *Apis mellifera*. Certain phytochemicals, including quercetin and *p*-coumaric acid, are ubiquitous in the honey bee diet and are known to upregulate cytochrome P450 genes encoding enzymes that detoxify insecticides. Thus, the possibility exists that these dietary phytochemicals interact with ingested imidacloprid to ameliorate toxicity by enhancing its detoxification.

### Approach

Quercetin and *p*-coumaric acid were incorporated in a phytochemical-free artificial diet individually and together along with imidacloprid at a range of field-realistic concentrations. In acute toxicity bioassays, honey bee 24- and 48- hour imidacloprid LC<sub>50</sub> values were determined in the presence of the phytochemicals. Additionally, chronic toxicity bioassays were conducted using varying concentrations of imidacloprid in diets with the phytochemicals to test impacts of phytochemicals on longevity.

### Results

In acute toxicity bioassays, the phytochemicals had no effect on imidacloprid LC<sub>50</sub> values. In chronic toxicity longevity bioassays, phytochemicals enhanced honey bee survival at low imidacloprid concentrations (15 and 45 ppb) but had a negative effect at higher concentrations (105 ppb and 135 ppb). *p*-Coumaric acid alone increased honey bee longevity at concentrations of 15 and 45 ppb imidacloprid (hazard ratio (HR): 0.83 and 0.70, respectively). Quercetin alone and in combination with *p*-coumaric acid similarly enhanced longevity at 45 ppb imidacloprid (HR:0.81 and HR:0.77, respectively). However, *p*-coumaric acid in combination with 105 ppb imidacloprid and quercetin in combination with 135 ppb imidacloprid increased honey bee HR by approximately 30% (HR:1.33 and HR:1.30, respectively).

## OPEN ACCESS

**Citation:** Wong MJ, Liao L-H, Berenbaum MR (2018) Biphasic concentration-dependent interaction between imidacloprid and dietary phytochemicals in honey bees (*Apis mellifera*). PLoS ONE 13(11): e0206625. <https://doi.org/10.1371/journal.pone.0206625>

**Editor:** James C. Nieh, University of California San Diego, UNITED STATES

**Received:** June 1, 2018

**Accepted:** October 16, 2018

**Published:** November 1, 2018

**Copyright:** This is an open access article, free of all copyright, and may be freely reproduced, distributed, transmitted, modified, built upon, or otherwise used by anyone for any lawful purpose. The work is made available under the [Creative Commons CC0](https://creativecommons.org/licenses/by/4.0/) public domain dedication.

**Data Availability Statement:** All relevant data are within the paper and its Supporting Information files.

**Funding:** This work was funded by National Honey Board and National Institute of Food and Agriculture 2017-67013 to MB. The funders had no role in study design, data collection and analysis, decision to publish, or preparation of the manuscript.

**Competing interests:** The authors have declared that no competing interests exist.

## Conclusions

The biphasic concentration-dependent response of honey bees to imidacloprid in the presence of two ubiquitous dietary phytochemicals indicates that there are limits to the protective effects of the natural diet of honey bees against neonicotinoids based on their own inherent toxicity.

## Introduction

The western honey bee (*Apis mellifera* L.) provides important pollination services for major crops around the world [1, 2] and is valued at more than \$15 billion per year [3] in the United States alone. However, in recent years losses in overwintering honey bee colonies in the United States have averaged approximately 30% annually [4, 5]. The factors that contribute to colony decline are multifaceted and include parasites, pests, diseases, monoculture agriculture, pesticides, nutrition, and modern beekeeping practices [6]. In particular, neonicotinoid pesticides such as imidacloprid have been a focus of attention [7] because of their systemic activity and widespread use, resulting in consistent presence of residues in nectar and pollen consumed by bees [8], a cause for concern due to their high toxicity to invertebrates [9]. Neonicotinoids are widely used because they are effective against a broad range of crop pests, acting as high-affinity irreversible agonists of the nicotinic acetylcholine receptor. This interaction causes a permanent influx of cations to stimulate surrounding neuronal membranes, where repeated firing of action potentials exhausts cell resources leads to insect paralysis or death [10]. Multiple sublethal effects of imidacloprid on honey bees have been documented [11, 12] and include reduced foraging rate [13], decreased mobility [14], decreased learning [15, 16], weakened immunity [17], delayed larval development and reduced adult longevity [18]. These effects have been documented in laboratory experiments at field-realistic doses of less than 20 ppb encompassing studies focused on single acute exposures [15] and chronic exposures [19] and both topical [14] and oral [20] exposure. However, imidacloprid residues vary widely depending on the crop and timing of application and can exceed 20 ppb in field settings [8].

Imidacloprid can disperse throughout the plant because it is a systemic water-soluble pesticide [21]. It exhibits long persistence in the environment [22, 23] and can travel far beyond applied fields, resulting in contamination of other plants via surface and ground water [24]. Honey bees thus encounter imidacloprid via a diversity of routes [23] throughout their life. Foragers can encounter imidacloprid either topically by flying through planter dust or settling on contaminated surfaces, or orally by ingesting nectar, pollen, and water. In water, especially guttation water or morning dew, imidacloprid can be present at even higher concentrations (up to 346 ppm [25, 26]) than in nectar, or pollen (range 0.05–912 ppb [8, 23]). Additionally, honey bees in a hive can encounter imidacloprid residues via ingestion of beebread (up to 912 ppb [27] and honey (up to 14 ppb) [21] and from contact with beeswax (up to 13.6 ppb) [27], albeit at levels much lower than in agricultural settings [23, 25, 26]. Thus, both acute and chronic toxicity of imidacloprid are important factors to consider when evaluating its effects on honey bees. Although there have been a large number of both laboratory-based and field-based experiments on the acute and chronic toxicity of imidacloprid on honey bees, there exists much debate on the reliability and interpretations of these studies [28–30]. The fact that colony-level variation exists in honey bee sensitivity to imidacloprid [31] means that an extensive sampling effort must be made across multiple colonies when estimating imidacloprid

toxicity. Seasonality [32], nutritional [33], environmental, and endogenous factors [34] all have the potential to induce variation in responses to neonicotinoid toxicity.

Honey bees typically ingest neonicotinoids as a contaminant in nectar, honey, pollen, and bee-bread, all of which are rich in phytochemicals. Honey bees thus of necessity consume neonicotinoids in a matrix of phytochemicals. They rely primarily on cytochrome P450 monooxygenases in the CYP6 and CYP9 families for detoxification of both phytochemicals and pesticides, including neonicotinoids [35, 36]. Exposure to sublethal levels of imidacloprid [37, 38] or dietary phytochemicals [39–43] results in upregulation of CYP6 and CYP9 P450s. In the specific case of the phenolic acid *p*-coumaric acid and the flavonol quercetin, found ubiquitously in honey, pollen and propolis, members of the CYP6AS subfamily and the CYP9Q subfamily are upregulated in both adults and larvae [41–43]. Whereas the CYP6AS subfamily is associated primarily with flavonoid metabolism [44, 45], enzymes in the CYP9Q subfamily metabolize both phytochemicals and pesticides, including imidacloprid in the case of CYP9Q1, CYP9Q2, and CYP9Q3 [36].

Accordingly, the possibility exists that co-occurring dietary phytochemicals alter behavioral or physiological responses of honey bees to imidacloprid. Quercetin reduces the acute toxicity of the pyrethroid tau-fluvalinate [39], and both quercetin and *p*-coumaric acid increase longevity of honey bees in the presence of two pyrethroids,  $\beta$ -cyfluthrin and bifenthrin [46]. All three of these pyrethroid insecticides are metabolized by members of the CYP9Q subfamily, suggesting that amelioration of pesticide toxicity by *p*-coumaric acid and quercetin is due to induction of these enzymes. A similar interaction might also exist between imidacloprid and phytochemicals because it is also metabolized by members of the CYP9Q subfamily [36] and processed by efflux transporters [47]. Other possible mechanisms of interaction are suggested by the findings of Guseman et al. [48], who showed that quercetin synergizes the toxicity of ivermectin and the neonicotinoid acetamiprid, possibly via interference with transporter proteins within the ABCB, ABCC and ABCG subfamilies.

In view of evidence that *p*-coumaric acid and quercetin upregulate P450 genes encoding pesticide-metabolizing enzymes, their consumption may affect the  $LC_{50}$  and lifespan of honey bees exposed to imidacloprid. In this study, we assessed the acute and chronic toxicological effects of imidacloprid in the presence of these two phytochemicals. To assess phytochemical effects on acute imidacloprid toxicity,  $LC_{50}$  values for imidacloprid were determined at 24- and 48 hours with the addition of quercetin and *p*-coumaric acid individually or in combination. Additionally, to assess the effects of phytochemicals on chronic imidacloprid toxicity, bees were challenged with a range of field-realistic concentrations of imidacloprid in a longevity bioassay with diets containing quercetin, *p*-coumaric acid, or both phytochemicals.

## Materials and methods

### Honey bees and general experimental procedure

Three *A. mellifera* colonies located in an apiary maintained by the University of Illinois at Urbana-Champaign in Urbana, IL were utilized during the summer of 2017. The colonies showed no signs of disease during the experimental period, and varroa mite counts were kept low through the end of summer (0 mite/300 bees for all colonies at the beginning of summer and 0, 9, 16 mites/300 bees at the end of summer) with the monitoring method of the standard alcohol wash procedure [49]. Frames of capped brood were taken from each colony and then moved into a dark incubator kept at 34°C and 50% humidity. After emergence within the incubator, the one-day-old bees were collected every 24 hours from frames until there were sufficient numbers of cohort bees from the same day and colony for at least one replicate.

Once a sufficient number of one-day-old bees emerged from the frames, for both the  $LC_{50}$  and longevity assay, they were transferred into closed clear 266-mL plastic cups with multiple

ventilation holes and two larger holes for the insertion of food and water feeder tubes. The general arrangement and positioning of experimental cages and feeders were modified from our previous research [46]. For the duration of the experiment, caged bees were kept in a dark incubator room at 34°C and 50% humidity. Each cage contained 25 newly-emerged day-old bees, as well as one-tenth of an artificial queen mandibular gland pheromone strip (DC-715, Mann Lake Ltd., Hackensack, MN) to simulate the pheromonal attributes of a queenright colony [46]. The cages were immediately provisioned with the appropriate treatment diet and deionized water in two 2-mL microcentrifuge feeder tubes with a 6-mm opening on the top for the bees to access *ad libitum*.

### Chemicals and initial treatment preparation

Imidacloprid (PS2086), quercetin (Q4951), *p*-coumaric acid (C9008), and casein (C3400) were purchased from Sigma–Aldrich Co. LLC. (St. Louis, MO), and were used to create treatment diets for the bioassays. Dimethyl sulfoxide (DMSO; D128, Fisher Scientific International, Inc., Pittsburgh, PA) was used as a solvent. Imidacloprid and the two phytochemicals were first dissolved in DMSO to make the 400× or higher concentrated stock solutions, which were then stored at -20°C.

A 50% (w/v) sucrose water diet with casein was prepared at a ratio of 1:12 protein to carbohydrate [46, 50] as the base diet. The base diet was made before use and stored at 4°C for no longer than a week. Casein was used as the primary source of protein because of its phytochemical-free nature and its long-established use as a protein source in insect artificial diets [51], including honey bee diets [46, 50]. Stock solutions of imidacloprid and phytochemicals were then added to prepare all diets freshly for use in both short-term LC<sub>50</sub> and long-term longevity assays. The base diet was augmented with phytochemical and/or imidacloprid DMSO stock solutions to freshly prepare different treatment diets for each assay. For the control diet, DMSO was also added to the base diet. As the result, the final concentration of all diets was 0.25% (v/v) DMSO.

### Effects of phytochemicals on honey bee imidacloprid LC<sub>50</sub> values for honey bees

For LC<sub>50</sub> assays, all quercetin-containing treatment diets were made up at a final concentration of 0.25 mM, and all *p*-coumaric acid-containing treatment diets were made up at a final concentration of 0.5 mM. These concentrations were chosen based on their potential for biological activity [42, 43, 46] and their activity in feeding preference behavior [52]; moreover, these represent concentrations well within the range typically encountered by adult honey bees [53–55]. Imidacloprid-containing treatment diets were prepared at concentrations of 0, 5, 10, 15, 20, and 25 ppm; these concentrations fall within the range encountered by bees under field conditions, (as in guttation water [25, 26]). Diets were replaced every 24 hours for each cage.

Honey bees were checked for mortality every 24 hours over a 48-hour time period. Food consumption data were not recorded but were assumed to be approximately 106.04–568.19 ng/bee/day of imidacloprid consumed based on the consumption rates measured in a similar study [46]. Bees that were immobile and unable to right themselves were scored as dead. Three replicates of each treatment from each of three colonies were used for this experiment, for a total of 9 replicates of 24 treatments (4 phytochemical treatments plus 6 imidacloprid concentrations) and resulted in a total of 5,400 honey bees at 216 cages in this LC<sub>50</sub> bioassay. All replicate treatments from a single colony were carried out on the same day, and all three colonies were tested within the same month (July 2017).

## Effects of phytochemicals and imidacloprid on honey bee longevity

Diets were prepared for the longevity assays by the same methods used to prepare diets for the  $LC_{50}$  assay. All treatments containing quercetin or/and *p*-coumaric acid were prepared at final concentrations of 0.25 mM and 0.5 mM, respectively. Treatments containing imidacloprid were prepared at concentrations of 0, 15, 45, 75, 105, and 135 ppb. These values represent the low range of field-realistic concentrations of imidacloprid in agricultural settings [8, 21, 23, 27] (in order to capture chronic rather than acute responses). Based on a similar longevity study [46], we estimate that 0.32–3.07 ng/bee/day of imidacloprid were consumed in this study. Diets were replaced every day. Water tubes were replaced every five days or when the volume of water fell below 1 mL. Cages were checked for mortality daily until the death of the last bee in each treatment. Overall, there were a total of 24 treatments with and without quercetin and/or *p*-coumaric acid with a range of imidacloprid concentrations. Three replicates of each treatment from each of the three colonies were used for this experiment, for a total of 216 cages and 5,400 honey bees in this longevity bioassay. Every treatment in each replicate began on the same day, with all replicate treatments from a single colony initiated within a three-day interval. All three colonies were tested with three weeks apart between June 2017 and August 2017

## Statistical analysis

Statistical analyses were conducted using R version 3.1.1 (R Core Team, Vienna, Austria) and SPSS software (version 22.0; IBM Corp., Armonk, NY, USA). OriginPro 2016 software (OriginLab Corporation, Northampton, MA, USA) was used to plot Kaplan-Meier survival curves. For the  $LC_{50}$  bioassays, Probit analysis was conducted using the “survival” statistical package to estimate the median lethal concentration needed to kill 50% of the honey bees over each 24-hour interval over 48 hours. The 95% confidence intervals for the corresponding  $LC_{50}$  values were determined using Fieller’s method [56]. Comparisons across treatments and colonies were made by analyzing the data for overlapping confidence intervals, in addition to performing pairwise  $LC_{50}$  likelihood ratio tests [57]. The pairwise ratio comparisons were considered significant if their 95% confidence interval included a “1” between the upper and lower bounds.

For the longevity bioassays, Cox’s proportional hazards regression models [58] were used to evaluate the hazard of death according to dietary phytochemicals and imidacloprid concentrations, adjusting for the hive identity as a covariate stratum. By this regression model, hazard ratio (HR) provides an estimate of effect size [59]. The relationship between the HR and survival functions can be characterized as  $S_T(t) = S_C(t)^{HR}$ , where  $S_T(t)$  and  $S_C(t)$  are the survival probability of treatment and control group at time  $t$ , respectively. When an effect of treatment was significant in the Cox model, the HR was calculated to express the magnitude of the effect of treatment. When  $HR > 1$ , the treatment factor presents a higher risk than that of the control group, and, when  $HR < 1$ , the treatment factor reduces the hazard risk relative to that of the control group. The Kaplan-Meier estimator was used to plot the survival curves and estimated mean and median. Of available tests for differences between survival curves, the log-rank test was used (treatment vs. control) to determine significance because of its power and its frequent use in survival analyses.

## Results

### Effects of phytochemicals on imidacloprid $LC_{50}$ values for honey bees

Results from the analysis of overlapping confidence intervals and the pairwise likelihood ratio tests showed that there were no significant differences between  $LC_{50}$  values for imidacloprid

**Table 1. Median-lethal concentration (LC<sub>50</sub>) for imidacloprid on diets varying in phytochemical content after 24 and 48 hours.**

| Phytochemical                       | n    | 24-hour                |                           | 48-hour                |              |
|-------------------------------------|------|------------------------|---------------------------|------------------------|--------------|
|                                     |      | LC <sub>50</sub> (ppm) | 95% CI <sup>a</sup> (ppm) | LC <sub>50</sub> (ppm) | 95% CI (ppm) |
| phytochemical-free                  | 1350 | 11.18                  | 9.48–12.88                | 6.83                   | 5.12–8.28    |
| 0.25mM <i>p</i> -coumaric acid      | 1350 | 11.27                  | 9.81–12.74                | 6.25                   | 4.976–7.35   |
| 0.5mM quercetin                     | 1350 | 10.70                  | 9.41–11.95                | 5.83                   | 4.25–7.14    |
| quercetin + <i>p</i> -coumaric acid | 1350 | 11.19                  | 9.77–12.60                | 6.28                   | 5.363–7.11   |

Bees were provided with five concentrations of imidacloprid-containing treatment diets (5, 10, 15, 20, and 25 ppm) and a DMSO control. n = a total number of bees included in the bioassay, LC<sub>50</sub> = lethal concentration 50% calculated by the probit model

<sup>a</sup> CI: Confidence Interval, confidence interval calculated using Fieller’s method

<https://doi.org/10.1371/journal.pone.0206625.t001>

**Table 2. Cox proportional hazards model analysis of effects of dietary phytochemicals in the presence of imidacloprid on adult bee longevity.**

| imidacloprid | phytochemical                       | Estimate | Standard error | χ <sup>2</sup> | df | P        | Hazard ratio |
|--------------|-------------------------------------|----------|----------------|----------------|----|----------|--------------|
| 0 ppb        | phytochemical-free                  |          |                | 28.88          | 3  | 0.000*** |              |
|              | <i>p</i> -coumaric acid             | -0.22    | 0.10           | 5.02           | 1  | 0.025*   | 0.81         |
|              | quercetin                           | -0.21    | 0.10           | 4.67           | 1  | 0.031*   | 0.81         |
|              | quercetin + <i>p</i> -coumaric acid | 0.23     | 0.10           | 5.81           | 1  | 0.016*   | 1.26         |
| 15 ppb       | control                             |          |                | 4.51           | 3  | 0.211    |              |
|              | <i>p</i> -coumaric acid             | -0.19    | 0.10           | 3.85           | 1  | 0.050*   | 0.83         |
|              | quercetin                           | -0.16    | 0.10           | 2.73           | 1  | 0.099    | 0.85         |
|              | quercetin + <i>p</i> -coumaric acid | -0.10    | 0.10           | 1.08           | 1  | 0.299    | 0.91         |
| 45 ppb       | phytochemical-free                  |          |                | 14.93          | 3  | 0.002**  |              |
|              | <i>p</i> -coumaric acid             | -0.36    | 0.10           | 14.21          | 1  | 0.000*** | 0.70         |
|              | quercetin                           | -0.21    | 0.10           | 4.89           | 1  | 0.027*   | 0.81         |
|              | quercetin + <i>p</i> -coumaric acid | -0.26    | 0.10           | 7.15           | 1  | 0.008**  | 0.77         |
| 75 ppb       | phytochemical-free                  |          |                | 3.90           | 3  | 0.273    |              |
|              | <i>p</i> -coumaric acid             | 0.02     | 0.10           | 0.06           | 1  | 0.814    | 1.02         |
|              | quercetin                           | 0.00     | 0.10           | 0.00           | 1  | 0.973    | 1.00         |
|              | quercetin + <i>p</i> -coumaric acid | -0.15    | 0.10           | 2.36           | 1  | 0.124    | 0.86         |
| 105 ppb      | phytochemical-free                  |          |                | 9.13           | 3  | 0.028*   |              |
|              | <i>p</i> -coumaric acid             | 0.29     | 0.10           | 8.84           | 1  | 0.003**  | 1.33         |
|              | quercetin                           | 0.10     | 0.09           | 1.04           | 1  | 0.309    | 1.10         |
|              | quercetin + <i>p</i> -coumaric acid | 0.13     | 0.10           | 1.84           | 1  | 0.175    | 1.14         |
| 135 ppb      | phytochemical-free                  |          |                | 9.55           | 3  | 0.023*   |              |
|              | <i>p</i> -coumaric acid             | 0.03     | 0.10           | 0.11           | 1  | 0.737    | 1.03         |
|              | quercetin                           | 0.26     | 0.10           | 7.56           | 1  | 0.006**  | 1.30         |
|              | quercetin + <i>p</i> -coumaric acid | 0.15     | 0.10           | 2.54           | 1  | 0.111    | 1.17         |

When hazard ratio > 1, the treatment factor presents a higher risk than that of the phytochemical-free group, and, when hazard ratio < 1, the treatment factor reduces the hazard risk than that of the phytochemical-free group.

\* *p* < 0.05

\*\* *p* < 0.01

\*\*\* *p* < 0.001.

<https://doi.org/10.1371/journal.pone.0206625.t002>

after 24 hours on the different phytochemical treatment diets (Table 1). All 24-hour imidacloprid LC<sub>50</sub> values ranged between 10.7 ppm– 11.3 ppm imidacloprid across the phytochemical treatments. Similarly, no significant differences in imidacloprid LC<sub>50</sub> values were found between treatments after 48 hours (Table 1). No overlapping confidence intervals were found between the treatments, and likelihood ratio tests also resulted in no significant differences. All 48-hour imidacloprid LC<sub>50</sub> values ranged from 5.8 ppm– 6.8 ppm imidacloprid across the phytochemical treatments.

### Effects of phytochemicals and imidacloprid on honey bee longevity

In chronic toxicity longevity bioassays, the Cox proportional hazards models (Cox model) analysis on the pooled results of 5,400 caged honey bees revealed that the hive source ( $p < 0.001$ ) affected the longevity of adult bees. This finding indicates that there is colony-level variation in phytochemical and imidacloprid sensitivity in the tested honey bee colonies (S1 Table). Thus, we used the hive identity as an adjusted stratum in the rest of our analysis.

Across all concentrations of imidacloprid treatments in the longevity assay, the presence of imidacloprid slightly reduced the average longevity of bees (HR: 1.001,  $p < 0.001$ ), while the presence of phytochemicals had no effect. However, within each concentration of imidacloprid, the phytochemicals had a concentration-dependent effect (Table 2). In the absence of imidacloprid, both phytochemicals individually, but not in combination, enhanced longevity and reduced the hazard ratio by approximately 19% (HR: 0.81) compared to diets lacking phytochemicals. Additionally, the two phytochemicals in combination had a negative effect (HR: 1.26) in which there was greater mortality risk compared to *p*-coumaric acid or quercetin alone in the absence of pesticides. In diets with low imidacloprid concentrations, *p*-coumaric acid increased longevity at 15 ppb (HR: 0.83), whereas *p*-coumaric acid and quercetin, both individually and in combination, increased longevity at 45 ppb (HR: 0.70–0.81), (Table 2). At 75 ppb, imidacloprid, the two phytochemicals did not affect lifespan. However, in diets with higher imidacloprid concentrations, the presence of *p*-coumaric acid reduced longevity at 105 ppb (HR: 1.33) and the presence of quercetin reduced longevity at 135 ppb (HR: 1.30) when compared to the phytochemical-free control treatment.

Within the Kaplan-Meier survivorship curves (Fig 1), differences in survival rates first appear to emerge between the fifth and tenth day within each treatment. Honey bees consuming *p*-coumaric acid experienced increased longevity compared to honey bees consuming the control diet in the absence of imidacloprid (log-rank test,  $\chi^2 = 6.52$ ,  $p = 0.01$ ; S2 and S3 Tables), whereas honey bees consuming *p*-coumaric acid and quercetin together had decreased longevity compared to bees consuming the control diet ( $\chi^2 = 5.40$ ,  $p = 0.02$ ), (Fig 1A). At 45 ppb imidacloprid, honey bees consuming *p*-coumaric acid had greater longevity than those feeding on the control diet ( $\chi^2 = 5.19$ ,  $p = 0.02$ ), (Fig 1C). At 75 ppb imidacloprid, there were no significant differences between the different phytochemical treatments (Fig 1D). At 105 ppb imidacloprid, honey bees consuming *p*-coumaric acid had decreased longevity compared to bees consuming the control diet ( $\chi^2 = 6.58$ ,  $p = 0.01$ ), (Fig 1E), while at 135 ppb imidacloprid bees consuming quercetin experienced decreased longevity compared to bees consuming the control diet ( $\chi^2 = 5.09$ ,  $p = 0.02$ ), (Fig 1F).

### Discussion

The phytochemicals *p*-coumaric acid and quercetin have the potential to increase honey bee longevity in the absence of pesticides. They can also prolong survival during exposure to imidacloprid, a phenomenon previously documented with exposure to pyrethroids [39, 46]. This study both expands the inventory of examples of phytochemical interaction with pesticide

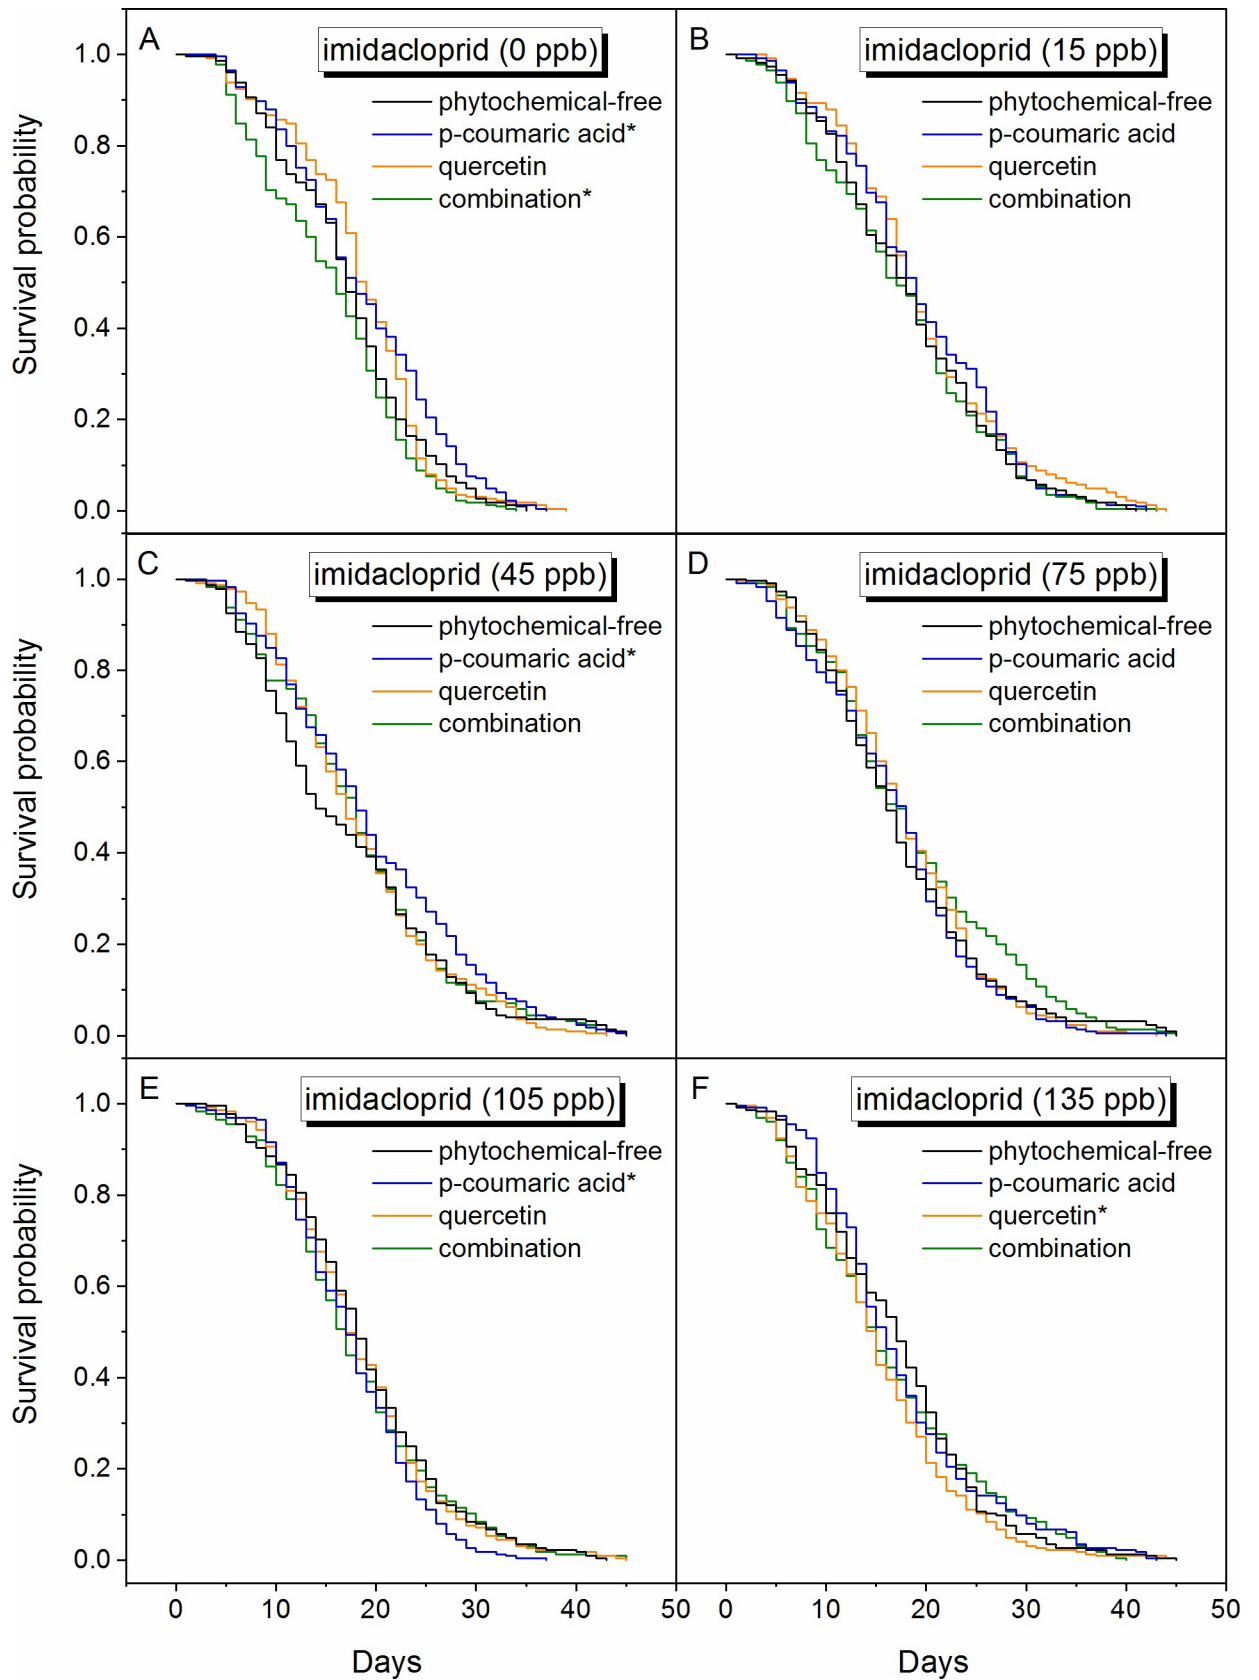



**Fig 1. Kaplan–Meier plot of honey bee survival function on different concentrations of imidacloprid with different phytochemical supplements.** These diets were (A) imidacloprid-free (B) 15 ppb imidacloprid, (C) 45 ppb imidacloprid, (D) 75 ppb imidacloprid, (E) 105 ppb imidacloprid, and (F) 1355 ppb imidacloprid. (Total 5,400 bees were tested;  $n = 225$  for each phytochemical sub-group; Log-rank test between treatments and control, \*  $p < 0.05$ ).

<https://doi.org/10.1371/journal.pone.0206625.g001>

toxicity and provides insight into the mechanisms underlying these interactions. The results of the chronic exposure bioassay showed a biphasic concentration-dependent response in bees, according to which *p*-coumaric acid and quercetin are beneficial to bees ingesting imidacloprid at low concentrations (45 ppb), but detrimental when concentrations of imidacloprid reach higher levels (105 and 135 ppb). At an intermediate level (75 ppb imidacloprid), phytochemical effects were undetectable. Additionally, in the absence of phytochemicals, sublethal concentrations of imidacloprid did not alter honey bee longevity (S4 Table). The biphasic response we found suggests that a hormetic interaction exists [60–63] between imidacloprid and phytochemicals on honey bee survival according to which low concentrations of synthetic xenobiotics in combination with phytochemicals result in higher viability, but higher concentrations of synthetic xenobiotics in combination with the same phytochemicals become toxic. This hormetic response has been demonstrated for other pesticides in honey bees [64, 65].

The benefits of consuming phytochemicals found in honey, pollen, and beebread for honey bees at low levels of imidacloprid may stem from their capacity to upregulate detoxifying P450s [39–41, 66]. Mao et al. [40–43] showed that phytochemicals, including *p*-coumaric acid and quercetin, differentially upregulate genes in the CYP6AS and CYP9Q subfamilies. Although the P450 inhibitors piperonyl butoxide, triflumizole, and propiconazole do not increase the toxicity of imidacloprid to honey bees [67], Manjon et al. [36] conclusively demonstrated that another P450 inhibitor, 1-aminobenzotriazole, increased sensitivity to imidacloprid by 2.7-fold and at the same time demonstrated via radioligand binding and functional expression studies that CYP9Q enzymes determine bee sensitivity to neonicotinoids. Thus, upregulation of relevant pesticide-detoxifying P450s by phytochemicals likely accounts for the enhanced longevity of bees consuming low levels of imidacloprid.

At concentrations of imidacloprid at or greater than 105 ppm, the presence of phytochemicals decreases longevity. One possible explanation may be that bees appear to rely on a very small number of broadly substrate-specific CYP9 enzymes to cope with neonicotinoids and other pesticides [36, 40]. In view of the fact that CYP9 enzymes also contribute to phytochemical metabolism, competition for access to the enzyme catalytic sites may reduce the beneficial effects of phytochemicals, which themselves have toxic effects when P450 activity is inhibited [40]. As a result, quercetin, imidacloprid, or both may accumulate and result in decreased lifespan. Additionally, higher concentrations of imidacloprid likely induce oxidative stress in insects, as they do in vertebrates (e.g. [68–70]). Given that neonicotinoids have a much higher selectivity factor for nicotinic acetylcholine receptors in insects compared to vertebrates [71], the resulting oxidative stress is also likely to be much greater. Additionally, imidacloprid downregulates both antioxidant and immunity genes in honey bee queens [72]; protective effects of both *p*-coumaric acid and quercetin against imidacloprid may result from their antioxidant properties, reducing pesticide-induced oxidative stress [73–76] at low levels of imidacloprid. Higher concentrations of imidacloprid with the concomitant oxidative stress associated with its toxicity may overwhelm the protective antioxidative effects of these two phytochemicals.

In our acute LC<sub>50</sub> toxicity tests of imidacloprid, consuming the phytochemicals individually or in combination all failed to provide beneficial effects. Thus, it appears that protective effects of phytochemicals against imidacloprid build up over a longer period of time than within the 24–48 hour timeframe used here for acute toxicity bioassays. However, this is not necessarily

the case for all pesticides encountered by honey bees; quercetin decreased the toxic effects of tau-fluvalinate within 24 hours [39]. A possible explanation for the failure of phytochemicals to “rescue” bees from toxic effects of imidacloprid could relate to the fact that the toxicity of imidacloprid manifests itself through a delayed reaction compared to other pesticides [20]. In addition, even though imidacloprid is metabolized rapidly in honey bees (five hour elimination half-life), its metabolites persist longer and are more toxic than imidacloprid [77]. Thus, detection of amelioration of toxicity over a 24- to 48-hour assay is unlikely. The fact that the 48-hour LC<sub>50</sub> values for all treatments were consistently greater than the 24-hour LC<sub>50</sub> values is likely attributable to the delayed toxic effects of imidacloprid compared to other pesticides [20]. Moreover, a cumulative toxic effect may have been involved. In our earlier study with tau-fluvalinate [39], the bees were challenged only at a single timepoint with the pesticide. In our current study, tested bees consumed imidacloprid + sugar water during the entire experimental period, which might negate the phytochemical “rescue” effect.

The LC<sub>50</sub> of imidacloprid calculated in this study is considerably greater than values reported in other studies. Although LC<sub>50</sub> values ranging from 54 ppb to as high as 600 ppb after 48 hours [20] were determined in other studies for honey bees, this study yielded an LC<sub>50</sub> value approximating 6 ppm, an order of magnitude higher than previously reported values. Discrepancies in these values may be attributable to colony-level differences in imidacloprid toxicity, as there does appear to be a strong colony effect regarding imidacloprid sensitivity [31, 33]. This possibility is further supported by the fact that many studies have estimated LC<sub>50</sub> values for imidacloprid in honey bees that vary by a factor of more than 100-fold (e.g. [20, 78]). This inter-colony variation in imidacloprid toxicity across different studies may reflect many factors, including differences in colony strength, disease presence, and colony food stores [31, 33, 34].

Quercetin and *p*-coumaric acid represent only two of a diversity of phytochemicals encountered by honey bees even over the course of a season in a single locality. The phytochemical composition of honey varies with the identity of plants from which nectar was collected to make the honey and consequently most honeys contain multiple phenolic acids and flavonols [79] as well as other constituents, including terpenoids, sulfur-containing compounds, and alkaloids [80, 81]. Thus, at the same time bees ingest a diversity of pesticides due to hive contamination [27], they also ingest complex mixtures of phytochemicals that may collectively have greater protective effects than have been detected here with just one phenolic acid (*p*-coumaric acid) and one flavonol (quercetin) [41], or, alternatively, greater antagonistic effects due to competitive inhibition of detoxification enzyme activity. Such interactions, particularly when multiple pesticides are involved, may have critical impacts on bee health in agricultural environments [67, 82], remain poorly understood. The biphasic concentration-dependent response of honey bees to imidacloprid in the presence of two ubiquitous dietary phytochemicals indicates that there are limits to the protective effects of the natural diet of honey bees against neonicotinoids based on their own inherent toxicity. At the same time, it serves as a reminder that the benefits of a phytochemically diverse diet consumed by bees may be altered in contemporary landscapes exposing them to a diet diverse in insecticides and other pesticides.

## Supporting information

**S1 Table. Summary hazard ratios of adult bee longevity from individual and combination data of each hive by effect of dietary phytochemicals and imidacloprid, obtained from Cox proportional hazards model analysis.**

(DOCX)

**S2 Table. Means and medians for survival time.**

(DOCX)

**S3 Table. Summary of the log-rank test between phytochemical-free group and each phytochemical treatment in different imidacloprid concentration.**

(DOCX)

**S4 Table. Cox proportional hazards model analysis of effects of imidacloprid in different concentration with a phytochemical-free diet on adult bee longevity.**

(DOCX)

## Acknowledgments

We thank Wen-Yen Wu, and William Montag for their assistance with conducting the honey bee bioassays and handling bees. We also thank Dr. Terry Harrison, Alison Sankey and other staffs at the University of Illinois Bee Research Facility for assistance and Dr. Gene Robinson for access to the UIUC apiaries. Finally, we thank Wade Coufal for being a great support during this process.

## Author Contributions

**Conceptualization:** Michael J. Wong, Ling-Hsiu Liao, May R. Berenbaum.

**Data curation:** Michael J. Wong, Ling-Hsiu Liao.

**Formal analysis:** Michael J. Wong, Ling-Hsiu Liao.

**Funding acquisition:** May R. Berenbaum.

**Investigation:** Michael J. Wong, Ling-Hsiu Liao.

**Methodology:** Michael J. Wong, Ling-Hsiu Liao, May R. Berenbaum.

**Project administration:** Michael J. Wong, Ling-Hsiu Liao, May R. Berenbaum.

**Resources:** May R. Berenbaum.

**Software:** Michael J. Wong, Ling-Hsiu Liao, May R. Berenbaum.

**Supervision:** May R. Berenbaum.

**Visualization:** Michael J. Wong, Ling-Hsiu Liao.

**Writing – original draft:** Michael J. Wong, Ling-Hsiu Liao, May R. Berenbaum.

**Writing – review & editing:** Michael J. Wong, Ling-Hsiu Liao, May R. Berenbaum.

## References

1. Delaplane KS, Mayer DF. Crop pollination by bees. Wallingford, UK: CABI Publishing; 2000.
2. Klein A-M, Vaissière BE, Cane JH, Steffan-Dewenter I, Cunningham SA, Kremen C, et al. Importance of pollinators in changing landscapes for world crops. *Proc R Soc B*. 2007; 274(1608):303–13. <https://doi.org/10.1098/rspb.2006.3721> PMID: 17164193.
3. Morse RA, Calderone NW. The value of honey bees as pollinators of US crops in 2000. *Bee culture*. 2000; 128(3):1–15.
4. Kulhanek K, Steinhauer N, Rennich K, Caron DM, Sagili RR, Pettis JS, et al. A national survey of managed honey bee 2015–2016 annual colony losses in the USA. *J Apic Res*. 2017; 56(4):328–40. <https://doi.org/10.1080/00218839.2017.1344496>

5. Seitz N, Traynor KS, Steinhauer N, Rennich K, Wilson ME, Ellis JD, et al. A national survey of managed honey bee 2014–2015 annual colony losses in the USA. *J Apic Res*. 2016; 54(4):292–304. <https://doi.org/10.1080/00218839.2016.1153294>
6. vanEngelsdorp D, Evans JD, Saegerman C, Mullin C, Haubruge E, Nguyen BK, et al. Colony collapse disorder: A descriptive study. *PLoS ONE*. 2009; 4(8):e6481. <https://doi.org/10.1371/journal.pone.0006481> PMID: 19649264.
7. Cressey D. The bitter battle over the world's most popular insecticides. *Nature*. 2017; 551(7679):156–8. <https://doi.org/10.1038/551156a> PMID: 29120435.
8. Blacquièrè T, Smaghe G, van Gestel CA, Mommaerts V. Neonicotinoids in bees: A review on concentrations, side-effects and risk assessment. *Ecotoxicology*. 2012; 21(4):973–92. <https://doi.org/10.1007/s10646-012-0863-x> PMID: 22350105.
9. Simon-Delso N, Amaral-Rogers V, Belzunces LP, Bonmatin JM, Chagnon M, Downs C, et al. Systemic insecticides (neonicotinoids and fipronil): trends, uses, mode of action and metabolites. *Environ Sci Pollut Res Int*. 2015; 22(1):5–34. <https://doi.org/10.1007/s11356-014-3470-y> PMID: 25233913.
10. Bai D, Lummis SCR, Leicht W, Breer H, Sattelle DB. Actions of imidacloprid and a related nitromethylene on cholinergic receptors of an identified insect motor neurone. *Pestic Sci*. 1991; 33(2):197–204. <https://doi.org/10.1002/ps.2780330208>
11. Pisa LW, Amaral-Rogers V, Belzunces LP, Bonmatin JM, Downs CA, Goulson D, et al. Effects of neonicotinoids and fipronil on non-target invertebrates. *Environmental Science and Pollution Research*. 2015; 22(1):68–102. <https://doi.org/10.1007/s11356-014-3471-x> PMID: 25223353
12. Godfray HC, Blacquièrè T, Field LM, Hails RS, Potts SG, Raine NE, et al. A restatement of recent advances in the natural science evidence base concerning neonicotinoid insecticides and insect pollinators. *Proc R Soc B*. 2015; 282(1818):20151821. <https://doi.org/10.1098/rspb.2015.1821> PMID: 26511042
13. Schneider CW, Tautz J, Grünewald B, Fuchs S. RFID tracking of sublethal effects of two neonicotinoid insecticides on the foraging behavior of *Apis mellifera*. *PLoS ONE*. 2012; 7(1):e30023. <https://doi.org/10.1371/journal.pone.0030023> PMID: 22253863.
14. Lambin M, Armengaud C, Raymond S, Gauthier M. Imidacloprid-induced facilitation of the proboscis extension reflex habituation in the honeybee. *Arch Insect Biochem Physiol*. 2001; 48(3):129–34. <https://doi.org/10.1002/arch.1065> PMID: 11673842.
15. Decourtye A, Armengaud C, Renou M, Devillers J, Cluzeau S, Gauthier M, et al. Imidacloprid impairs memory and brain metabolism in the honeybee (*Apis mellifera* L.). *Pestic Biochem Physiol*. 2004; 78(2):83–92. <https://doi.org/10.1016/j.pestbp.2003.10.001>
16. Yang E-C, Chang H-C, Wu W-Y, Chen Y-W. Impaired olfactory associative behavior of honeybee workers due to contamination of imidacloprid in the larval stage. *PLoS ONE*. 2012; 7(11):e49472. <https://doi.org/10.1371/journal.pone.0049472> PMID: 23166680.
17. Pettis JS, vanEngelsdorp D, Johnson J, Dively G. Pesticide exposure in honey bees results in increased levels of the gut pathogen *Nosema*. *Naturwissenschaften*. 2012; 99(2):153–8. <https://doi.org/10.1007/s00114-011-0881-1> PMID: 22246149
18. Wu JY, Anelli CM, Sheppard WS. Sub-lethal effects of pesticide residues in brood comb on worker honey bee (*Apis mellifera*) development and longevity. *PLoS ONE*. 2011; 6(2):e14720. <https://doi.org/10.1371/journal.pone.0014720> PMID: 21373182.
19. Schmuck R, Schöning R, Stork A, Schramel O. Risk posed to honeybees (*Apis mellifera* L., Hymenoptera) by an imidacloprid seed dressing of sunflowers. *Pest Manage Sci*. 2001; 57(3):225–38. <https://doi.org/10.1002/ps.270> PMID: 11455652.
20. Suchail S, Guez D, Belzunces LP. Discrepancy between acute and chronic toxicity induced by imidacloprid and its metabolites in *Apis mellifera*. *Environ Toxicol Chem*. 2001; 20(11):2482–6. <https://doi.org/10.1002/etc.5620201113> PMID: 11699773.
21. Stoner KA, Eitzer BD. Movement of soil-applied imidacloprid and thiamethoxam into nectar and pollen of squash (*Cucurbita pepo*). *PLoS ONE*. 2012; 7(6):e39114. <https://doi.org/10.1371/journal.pone.0039114> PMID: 22761727.
22. Haith DA. Ecological risk assessment of pesticide runoff from grass surfaces. *Environ Sci Technol*. 2010; 44(16):6496–502. <https://doi.org/10.1021/es101636y> PMID: 20666475.
23. Alkassab AT, Kirchner WH. Sublethal exposure to neonicotinoids and related side effects on insect pollinators: honeybees, bumblebees, and solitary bees. *J Plant Dis Prot*. 2017; 124(1):1–30. <https://doi.org/10.1007/s41348-016-0041-0>
24. Van Dijk TC, Van Staalduinen MA, Van der Sluijs JP. Macro-invertebrate decline in surface water polluted with imidacloprid. *PLoS ONE*. 2013; 8(5):e62374. <https://doi.org/10.1371/journal.pone.0062374> PMID: 23650513.

25. Tapparo A, Giorio C, Marzaro M, Marton D, Soldà L, Girolami V. Rapid analysis of neonicotinoid insecticides in guttation drops of corn seedlings obtained from coated seeds. *J Environ Monit*. 2011; 13(6):1564–8. <https://doi.org/10.1039/c1em10085h> PMID: 21509402.
26. Hoffmann EJ, Castle SJ. Imidacloprid in melon guttation fluid: A potential mode of exposure for pest and beneficial organisms. *J Econ Entomol*. 2012; 105(1):67–71. <https://doi.org/10.1603/EC11251> PMID: 22420257.
27. Mullin CA, Frazier M, Frazier JL, Ashcraft S, Simonds R, Vanengelsdorp D, et al. High levels of miticides and agrochemicals in North American apiaries: implications for honey bee health. *PLoS ONE*. 2010; 5(3):e9754. <https://doi.org/10.1371/journal.pone.0009754> PMID: 20333298
28. Cresswell JE. A meta-analysis of experiments testing the effects of a neonicotinoid insecticide (imidacloprid) on honey bees. *Ecotoxicology*. 2011; 20(1):149–57. <https://doi.org/10.1007/s10646-010-0566-0> PMID: 21080222.
29. Carreck NL, Ratnieks FLW. The dose makes the poison: Have “field realistic” rates of exposure of bees to neonicotinoid insecticides been overestimated in laboratory studies? *J Apic Res*. 2014; 53(5):607–14. <https://doi.org/10.3896/IBRA.1.53.5.08>
30. Chagnon M, Kreutzweiser D, Mitchell EA, Morrissey CA, Noome DA, Van der Sluijs JP. Risks of large-scale use of systemic insecticides to ecosystem functioning and services. *Environ Sci Pollut Res Int*. 2015; 22(1):119–34. <https://doi.org/10.1007/s11356-014-3277-x> PMID: 25035052.
31. Fairbrother A, Purdy J, Anderson T, Fell R. Risks of neonicotinoid insecticides to honeybees. *Environ Toxicol Chem*. 2014; 33(4):719–31. <https://doi.org/10.1002/etc.2527> PMID: 24692231.
32. Decourtye A, Lacassie E, Pham-Delègue M-HH. Learning performances of honeybees (*Apis mellifera* L.) are differentially affected by imidacloprid according to the season. *Pest Manage Sci*. 2003; 59(3):269–78. <https://doi.org/10.1002/ps.631> PMID: 12639043
33. Tosi S, Nieh JC, Sgolastra F, Cabbri R, Medrzycki P. Neonicotinoid pesticides and nutritional stress synergistically reduce survival in honey bees. *Proc R Soc B*. 2017; 284(1869):20171711. <https://doi.org/10.1098/rspb.2017.1711> PMID: 29263280.
34. Poquet Y, Vidau C, Alaux C. Modulation of pesticide response in honeybees. *Apidologie*. 2016; 47(3):412–26. <https://doi.org/10.1007/s13592-016-0429-7>
35. Berenbaum MR, Johnson RM. Xenobiotic detoxification pathways in honey bees. *Curr Opin Insect Sci*. 2015; 10:51–8. <https://doi.org/10.1016/j.cois.2015.03.005> PMID: 29588014
36. Manjon C, Troczka BJ, Zaworra M, Beadle K, Randall E, Hertlein G, et al. Unravelling the molecular determinants of bee sensitivity to neonicotinoid insecticides. *Curr Biol*. 2018; 28(7):1137–43. <https://doi.org/10.1016/j.cub.2018.02.045> PMID: 29576476.
37. Derecka K, Blythe MJ, Malla S, Genereux DP, Guffanti A, Pavan P, et al. Transient exposure to low levels of insecticide affects metabolic networks of honeybee larvae. *PLoS ONE*. 2013; 8(7):e68191. <https://doi.org/10.1371/journal.pone.0068191> PMID: 23844170.
38. De Smet L, Hatjina F, Ioannidis P, Hamamtzoglou A, Schoonvaere K, Francis F, et al. Stress indicator gene expression profiles, colony dynamics and tissue development of honey bees exposed to sub-lethal doses of imidacloprid in laboratory and field experiments. *PLoS ONE*. 2017; 12(2):e0171529. <https://doi.org/10.1371/journal.pone.0171529> PMID: 28182641.
39. Johnson RM, Mao W, Pollock HS, Niu G, Schuler MA, Berenbaum MR. Ecologically appropriate xenobiotics induce cytochrome P450s in *Apis mellifera*. *PLoS ONE*. 2012; 7(2):e31051. <https://doi.org/10.1371/journal.pone.0031051> PMID: 22319603
40. Mao W, Schuler MA, Berenbaum MR. CYP9Q-mediated detoxification of acaricides in the honey bee (*Apis mellifera*). *Proc Natl Acad Sci USA*. 2011; 108(31):12657–62. <https://doi.org/10.1073/pnas.1109535108> PMID: 21775671.
41. Mao W, Schuler MA, Berenbaum MR. Honey constituents up-regulate detoxification and immunity genes in the western honey bee *Apis mellifera*. *Proc Natl Acad Sci USA*. 2013; 110(22):8842–6. <https://doi.org/10.1073/pnas.1303884110> PMID: 23630255
42. Mao W, Schuler MA, Berenbaum MR. A dietary phytochemical alters caste-associated gene expression in honey bees. *Sci Adv*. 2015; 1(7):e1500795. <https://doi.org/10.1126/sciadv.1500795> PMID: 26601244
43. Mao W, Schuler MA, Berenbaum MR. Disruption of quercetin metabolism by fungicide affects energy production in honey bees (*Apis mellifera*). *Proc Natl Acad Sci USA*. 2017; 114(10):2538–43. <https://doi.org/10.1073/pnas.1614864114> PMID: 28193870.
44. Li X, Schuler MA, Berenbaum MR. Molecular mechanisms of metabolic resistance to synthetic and natural xenobiotics. *Annu Rev Entomol*. 2007; 52(1):231–53. <https://doi.org/10.1146/annurev.ento.51.110104.151104> PMID: 16925478.

45. Mao W, Rupasinghe SG, Johnson RM, Zangerl AR, Schuler MA, Berenbaum MR. Quercetin-metabolizing CYP6AS enzymes of the pollinator *Apis mellifera* (Hymenoptera: Apidae). *Comp Biochem Physiol, B: Biochem Mol Biol*. 2009; 154(4):427–34. <https://doi.org/10.1016/j.cbpb.2009.08.008> PMID: 19737624
46. Liao L-H, Wu W-Y, Berenbaum MR. Impacts of dietary phytochemicals in the presence and absence of pesticides on longevity of honey bees (*Apis mellifera*). *Insects*. 2017; 8(1):22. <https://doi.org/10.3390/insects8010022> PMID: 28216580
47. Hawthorne DJ, Dively GP. Killing them with kindness? In-hive medications may inhibit xenobiotic efflux transporters and endanger honey bees. *PLoS ONE*. 2011; 6(11):e26796. <https://doi.org/10.1371/journal.pone.0026796> PMID: 22073195.
48. Guseman AJ, Miller K, Kunkle G, Dively GP, Pettis JS, Evans JD, et al. Multi-drug resistance transporters and a mechanism-based strategy for assessing risks of pesticide combinations to honey bees. *PLoS ONE*. 2016; 11(2):e0148242. <https://doi.org/10.1371/journal.pone.0148242> PMID: 26840460.
49. Shimanuki H, Knox DA. Diagnosis of honey bee diseases. Agricultural handbook No. 690. USDA. 2000.
50. Altaye SZ, Pirk CWW, Crewe RM, Nicolson SW. Convergence of carbohydrate-biased intake targets in caged worker honeybees fed different protein sources. *J Exp Biol*. 2010; 213(Pt 19):3311–8. <https://doi.org/10.1242/jeb.046953> PMID: 20833924.
51. Lee KP. The interactive effects of protein quality and macronutrient imbalance on nutrient balancing in an insect herbivore. *J Exp Biol*. 2007; 210(18):3236–44. <https://doi.org/10.1242/jeb.008060> PMID: 17766301.
52. Liao L-H, Wu W-Y, Berenbaum MR. Behavioral responses of honey bees (*Apis mellifera*) to natural and synthetic xenobiotics in food. *Sci Rep*. 2017; 7(1):15924. <https://doi.org/10.1038/s41598-017-15066-5> PMID: 29162843.
53. Bonvehí SJ, Torrentó SM, Lorente CE. Evaluation of polyphenolic and flavonoid compounds in honey-bee-collected pollen produced in Spain. *J Agric Food Chem*. 2001; 49(4):1848–53. <https://doi.org/10.1021/jf0012300> PMID: 11308335
54. Kaškonienė V, Ruočkusienė G, Kaškonas P, Akuneca I, Maruška A. Chemometric analysis of bee pollen based on volatile and phenolic compound compositions and antioxidant properties. *Food Anal Methods*. 2015; 8(5):1150–63. <https://doi.org/10.1007/s12161-014-9996-2>
55. Ceksteryte V, Kazlauskas S, Racys J. Composition of flavonoids in Lithuanian honey and beebread. *Biologija*. 2006; 2:28–33.
56. Hoekstra JA. Estimation of the LC50, a review. *Environmetrics*. 1991; 2(2):139–52. <https://doi.org/10.1002/env.3770020203>
57. Wheeler MW, Park RM, Bailer JA. Comparing median lethal concentration values using confidence interval overlap or ratio tests. *Environ Toxicol Chem*. 2006; 25(5):1441–4. <https://doi.org/10.1897/05-320R.1> PMID: 16704080
58. Cox DR. Regression models and life-tables. *J Roy Stat Soc Ser B (Stat Method)*. 1972; 34(2):187–220. [https://doi.org/10.1007/978-1-4612-4380-9\\_37](https://doi.org/10.1007/978-1-4612-4380-9_37)
59. Zwiener I, Blettner M, Hommel G. Survival Analysis. *Dtsch Arztebl Int*. 2011; 108(10):163–9. <https://doi.org/10.3238/arztebl.2010.0163> PMID: 21475574.
60. Kaiser J. Sipping from a poisoned chalice. *Science*. 2003; 302(5644):376–9. <https://doi.org/10.1126/science.302.5644.376> PMID: 14563981.
61. Calabrese EJ. Biphasic dose responses in biology, toxicology and medicine: Accounting for their generalizability and quantitative features. *Environ Pollut*. 2013; 182:452–60. <https://doi.org/10.1016/j.envpol.2013.07.046> PMID: 23992683.
62. Cutler CG. Insects, insecticides and hormesis: evidence and considerations for study. *Dose-Response*. 2013; 11(2):154–77. <https://doi.org/10.2203/dose-response.12-008.Cutler> PMID: 23930099.
63. Guedes RC, Cutler CG. Insecticide-induced hormesis and arthropod pest management. *Pest Manage Sci*. 2014; 70(5):690–7. <https://doi.org/10.1002/ps.3669> PMID: 24155227.
64. Cutler CG, Rix RR. Can poisons stimulate bees? Appreciating the potential of hormesis in bee-pesticide research. *Pest Manage Sci*. 2015; 71(10):1368–70. <https://doi.org/10.1002/ps.4042> PMID: 25989135.
65. Tosi S, Démares FJ, Nicolson SW, Medrzycki P, Pirk C, Human H. Effects of a neonicotinoid pesticide on thermoregulation of African honey bees (*Apis mellifera scutellata*). *J Insect Physiol*. 2016; 93:56–63. <https://doi.org/10.1016/j.jinsphys.2016.08.010> PMID: 27568395.
66. Vannette RL, Mohamed A, Johnson BR. Forager bees (*Apis mellifera*) highly express immune and detoxification genes in tissues associated with nectar processing. *Sci Rep*. 2015; 5:16224. <https://doi.org/10.1038/srep16224> PMID: 26549293.

67. Iwasa T, Motoyama N, Ambrose JT, Roe RM. Mechanism for the differential toxicity of neonicotinoid insecticides in the honey bee, *Apis mellifera*. *Crop Protect*. 2004; 23(5):371–8. <https://doi.org/10.1016/j.cropro.2003.08.018>
68. Duzguner V, Erdogan S. Chronic exposure to imidacloprid induces inflammation and oxidative stress in the liver & central nervous system of rats. *Pestic Biochem Physiol*. 2012; 104(1):58–64. <https://doi.org/10.1016/j.pestbp.2012.06.011>
69. Ince S, Kucukkurt I, Demirel HH, Turkmen R, Zemheri F, Akbel E. The role of thymoquinone as antioxidant protection on oxidative stress induced by imidacloprid in male and female Swiss albino mice. *Toxicol Environ Chem*. 2013; 95(2):318–29. <https://doi.org/10.1080/02772248.2013.764672>
70. Ge W, Yan S, Wang J, Zhu L, Chen A, Wang J. Oxidative stress and DNA damage induced by imidacloprid in zebrafish (*Danio rerio*). *J Agric Food Chem*. 2015; 63(6):1856–62. <https://doi.org/10.1021/jf504895h> PMID: 25607931.
71. Tomizawa M, Casida JE. Neonicotinoid insecticide toxicology: Mechanisms of selective action. *Annu Rev Pharmacol Toxicol*. 2005; 45(1):247–68. <https://doi.org/10.1146/annurev.pharmtox.45.120403.095930> PMID: 15822177.
72. Chaimanee V, Evans JD, Chen Y, Jackson C, Pettis JS. Sperm viability and gene expression in honey bee queens (*Apis mellifera*) following exposure to the neonicotinoid insecticide imidacloprid and the organophosphate acaricide coumaphos. *J Insect Physiol*. 2016; 89:1–8. <https://doi.org/10.1016/j.jinsphys.2016.03.004> PMID: 26979384.
73. Akdemir FNE, Albayrak M, Çalik M, Bayir Y, Gülçin İ. The protective effects of *p*-coumaric acid on acute liver and kidney damages induced by cisplatin. *Biomedicines*. 2017; 5(2):e18. <https://doi.org/10.3390/biomedicines5020018> PMID: 28536361.
74. Anand David AV, Arulmoli R, Parasuraman S. Overviews of biological importance of quercetin: A bioactive flavonoid. *Phcog Rev*. 2016; 10(20):84–9. <https://doi.org/10.4103/0973-7847.194044> PMID: 28082789.
75. Costa LG, Garrick JM, Roquè PJ, Pellacani C. Mechanisms of neuroprotection by quercetin: Counteracting oxidative stress and more. *Oxid Med Cell Longev*. 2016;2016:Article ID 2986796. <https://doi.org/10.1155/2016/2986796> PMID: 26904161.
76. Ekinci-Akdemir FN, Gülçin I, Gürsul C, Alwasel SH, Bayir Y. Effect of *p*-coumaric acid against oxidative stress induced by cisplatin in brain tissue of rats. *J Anim Plant Sci*. 2017; 27(5):1560–4. PMID: 126243238.
77. Suchail S, Sousa G, Rahmani R, Belzunces LP. *In vivo* distribution and metabolisation of 14C- imidacloprid in different compartments of *Apis mellifera* L. *Pest Manage Sci*. 2004; 60(11):1056–62. <https://doi.org/10.1002/ps.895> PMID: 15532678.
78. Fischer DL, Chalmers A. Neonicotinoid insecticides and honey bees: Technical answers to FAQs2007: [1–14 pp.]. Available from: <http://www.bee-quick.com/reprints/imd/BayerFAQ.pdf>.
79. Gheldof N, Engeseth NJ. Antioxidant capacity of honeys from various floral sources based on the determination of oxygen radical absorbance capacity and inhibition of *in vitro* lipoprotein oxidation in human serum samples. *J Agric Food Chem*. 2002; 50(10):3050–5. <https://doi.org/10.1021/jf0114637> PMID: 11982440
80. Dübecke A, Beckh G, Lüllmann C. Pyrrolizidine alkaloids in honey and bee pollen. *Food Addit Contam*. 2011; 28(3):348–58. <https://doi.org/10.1080/19440049.2010.541594> PMID: 21360377.
81. Jerković I, Kuš PM. Headspace solid-phase microextraction and ultrasonic extraction with the solvent sequences in chemical profiling of *Allium ursinum* L. honey. *Molecules*. 2017; 22(11):E1909. <https://doi.org/10.3390/molecules22111909> PMID: 29113106.
82. Berenbaum MR. Does the honey bee "risk cup" runneth over? Estimating aggregate exposures for assessing pesticide risks to honey bees in agroecosystems. *J Agric Food Chem*. 2016; 64(1):13–20. <https://doi.org/10.1021/acs.jafc.5b01067> PMID: 25885594.
